# Supplementary material
Source: Springer Nature journal article supplement (https://www.springermedizin.de/resource/supplementary/12916_2014_987_MOESM2_ESM.pdf/9598962)
Supplement: MOESM2 [file 9598962]

**Supplemental Table 2. Treatment doses and schedules for the RCTs included in the network**

| <b>Trial</b>       | <b>Treatment</b>               | <b>Dose and Schedule</b>                                                                                                  |
|--------------------|--------------------------------|---------------------------------------------------------------------------------------------------------------------------|
| O'Shaughnessy 2001 | capecitabine                   | 1255mg/m <sup>2</sup> 2X daily (2 weeks on/1 week off) (orally)                                                           |
| JCOG9802 2009      | cyclophosphamide + doxorubicin | 500mg/m <sup>2</sup> + 40mg/m <sup>2</sup> Q3W                                                                            |
| ANZBCTG 1986       | cyclophosphamide + doxorubicin | 750mg/m <sup>2</sup> + 50mg/m <sup>2</sup> Q3W (IV)                                                                       |
| Villalon 1993      | CMF                            | 100mg/m <sup>2</sup> days 1 + 14 (orally); 40mg/m <sup>2</sup> days 1 + 8 (IV); 600mg/m <sup>2</sup> days 1 + 8 (IV); Q4W |
| O'Shaughnessy 2001 | CMF                            | 600mg/m <sup>2</sup> (IV); 40mg/m <sup>2</sup> (IV); 600mg/m <sup>2</sup> (IV); Q3W                                       |
| Meier 2008         | docetaxel                      | 35mg/m <sup>2</sup> once weekly X6 every 8 weeks (premed with dexamethasone)                                              |
| BSMO Study 2010    | docetaxel                      | 36mg/m <sup>2</sup> QW for 8 weeks, then 3wk on/ 1 wk. off or 2wk on/1 wk. off (IV)                                       |
| Yardley 2009       | docetaxel                      | 36mg/m <sup>2</sup> days 1, 8, 15 Q4W (IV) (premed dexamethasone)                                                         |
| JCOG9802 2009      | docetaxel                      | 60mg/m <sup>2</sup> Q3W (IV) (premed dexamethasone)                                                                       |
| Gradishar 2009     | docetaxel                      | 100mg/m <sup>2</sup> Q3W (premed with oral corticosteroids)                                                               |
| Chan 1999          | docetaxel                      | 100mg/m <sup>2</sup> Q3W (IV for 1 hr.) (premed with dexamethasone)                                                       |
| Jones 2005         | docetaxel                      | 100mg/m <sup>2</sup> Q3W (IV) (premed with dexamethasone)                                                                 |
| Cowan 1991         | doxorubicin                    | 60mg/m <sup>2</sup> Q3W (IV for 15min)                                                                                    |
| O'Brien 2004       | doxorubicin                    | 60mg/m <sup>2</sup> Q3W (IV)                                                                                              |
| E1193 2003         | doxorubicin                    | 60mg/m <sup>2</sup> Q3W (IV)                                                                                              |
| EORTC 10811 1998   | doxorubicin                    | 74mg/m <sup>2</sup> Q3W (IV) (3 week cycle)                                                                               |
| Chan 1999          | doxorubicin                    | 75mg/m <sup>2</sup> Q3W (IV for 15-20 mins)                                                                               |
| Henderson 1989     | doxorubicin                    | 75mg/m <sup>2</sup> Q3W (IV)                                                                                              |
| Paridaens 2000     | doxorubicin                    | 75mg/m <sup>2</sup> Q3W (IV)                                                                                              |
| EORTC 10811 1998   | epirubicin                     | 90mg/m <sup>2</sup> Q3W (IV) (3 week cycle)                                                                               |
| BOLERO-II 2012     | everolimus + exemestane        | 10mg daily + 25mg daily (orally)                                                                                          |
| TAMRAD 2012        | everolimus + tamoxifen         | 10mg daily + 20mg daily (orally)                                                                                          |
| BOLERO-II 2012     | exemestane                     | 25mg daily (orally)                                                                                                       |
| EORTC-10951 2008   | exemestane                     | 25mg daily (orally)                                                                                                       |
| Kaufmann 2000      | exemestane                     | 25mg daily (orally)                                                                                                       |
| Yardley 2009       | liposomal doxorubicin          | 40mg/m <sup>2</sup> Q4W (IV)                                                                                              |
| Kaufmann 2000      | megestrol acetate              | 40mg 4X daily (orally)                                                                                                    |
| POA study 1985     | megestrol acetate              | 40mg 4X daily (orally)                                                                                                    |
| Ingle 1982         | megestrol acetate              | 150mg/m <sup>2</sup> daily (3 divided doses daily) (orally)                                                               |
| Villalon 1993      | megestrol acetate              | 160mg daily (orally)                                                                                                      |
| Gill 1993          | megestrol acetate              | 160mg daily                                                                                                               |
| Dixon 1992         | megestrol acetate              | 160mg 2X daily                                                                                                            |
| Cowan 1991         | mitoxantrone                   | 14mg/m <sup>2</sup> Q3W (IV for 10min)                                                                                    |

| <b>Trial</b>     | <b>Treatment</b>                | <b>Dose and Schedule</b>                                                            |
|------------------|---------------------------------|-------------------------------------------------------------------------------------|
| Henderson 1989   | mitoxantrone                    | 14mg/m <sup>2</sup> Q3W (IV)                                                        |
| Dixon 1992       | mitoxantrone                    | 14mg/m <sup>2</sup> Q3W (IV) (4 courses)                                            |
| BSMO Study 2010  | paclitaxel                      | 80mg/m <sup>2</sup> QW for 8 weeks, then 3wk on/ 1 wk. off or 2wk on/1 wk. off (IV) |
| Jones 2005       | paclitaxel                      | 175mg/m <sup>2</sup> Q3W (IV)                                                       |
| E1193 2003       | paclitaxel                      | 175mg/m <sup>2</sup> Q3W                                                            |
| Paridaens 2000   | paclitaxel                      | 200mg/m <sup>2</sup> Q3W (IV)                                                       |
| O'Brien 2004     | pegylated liposomal doxorubicin | 50mg/m <sup>2</sup> Q4W (IV)                                                        |
| Ingle 1982       | tamoxifen                       | 10mg 2X daily (orally)                                                              |
| POA study 1985   | tamoxifen                       | 10mg 2X daily (orally)                                                              |
| Taylor 1986      | tamoxifen                       | 10mg 2X daily (orally) (4 week cycle)                                               |
| TAMRAD 2012      | tamoxifen                       | 20mg daily (orally)                                                                 |
| EORTC-10951 2008 | tamoxifen                       | 20mg daily (orally)                                                                 |
| ANZBCTG 1986     | tamoxifen                       | 20mg 2X daily (orally)                                                              |
| Gill 1993        | tamoxifen                       | 20mg 2X daily (40mg total)                                                          |
| Meier 2008       | vinorelbine                     | 30mg/m <sup>2</sup> once weekly X 6 every 8 weeks                                   |

*CD-cyclophosphamide + doxorubicin; CMF- cyclophosphamide + methotrexate + 5-fluorouracil; IV-intravenous; MA- megestrol acetate; mins-minutes; PLD-pegylated liposomal doxorubicin; QW-weekly; Q3W-every three weeks; Q4W-every four weeks; wk-week*
